# Supplementary material for: A Conserved Domain in the Scc3 Subunit of Cohesin Mediates the Interaction with Both Mcd1 and the Cohesin Loader Complex
Source: PubMed Central journal article supplement (PMC4352044; doi:10.1371/journal.pgen.1005036), 2015-03-06

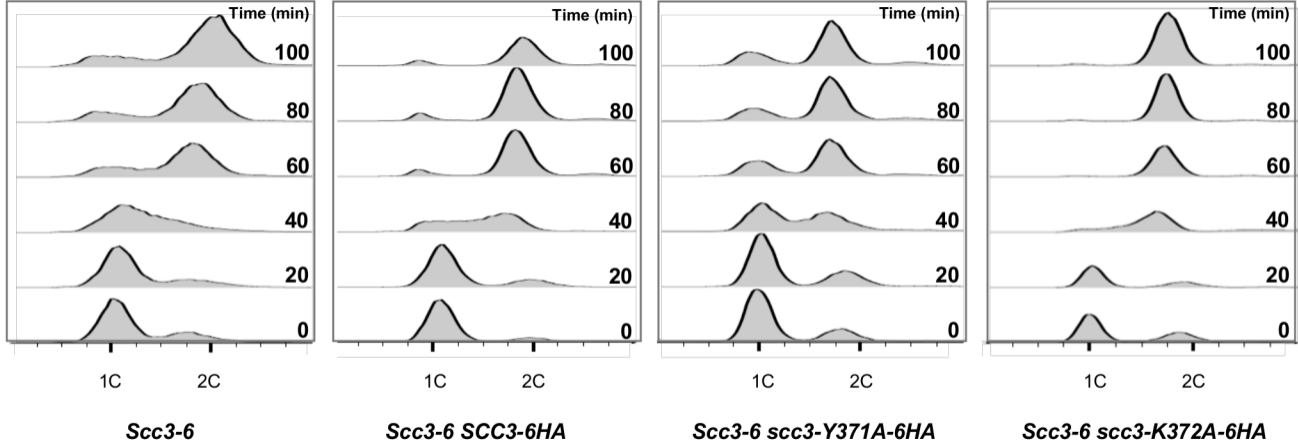

Supplement: pgen.1005036.s004.pdf [file pgen.1005036.s004.pdf]
