# Supplementary material for: A Conserved Domain in the Scc3 Subunit of Cohesin Mediates the Interaction with Both Mcd1 and the Cohesin Loader Complex
Source: PubMed Central journal article supplement (PMC4352044; doi:10.1371/journal.pgen.1005036), 2015-03-06
Supplement: pgen.1005036.s005.pdf [file pgen.1005036.s005.pdf]

Input

SCC3    SCC3-6HA    scc3-Y371A-6HA

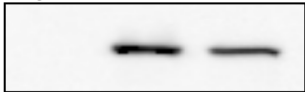

Scc3-6HA

*scc3-6*

SCC3    SCC3-6HA    scc3-Y371A-6HA

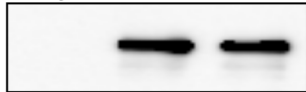

IP (αHA)

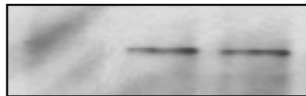

co-IP (αSmc3-Ac-K113)
